# Supplementary material
Source: ML conference proceedings conference paper supplement (https://proceedings.mlr.press/v130/jaini21a.html)
Supplement: Supplementary file [file jaini21a-supp.pdf]

## A Additional Results

We here provide additional results for the Ising model experiment in Sec. 5. The results are shown in Fig. 3.

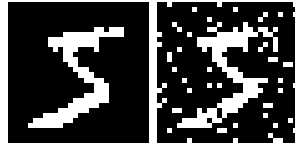

(a) True MNIST digit and observed corrupted MNIST digit.

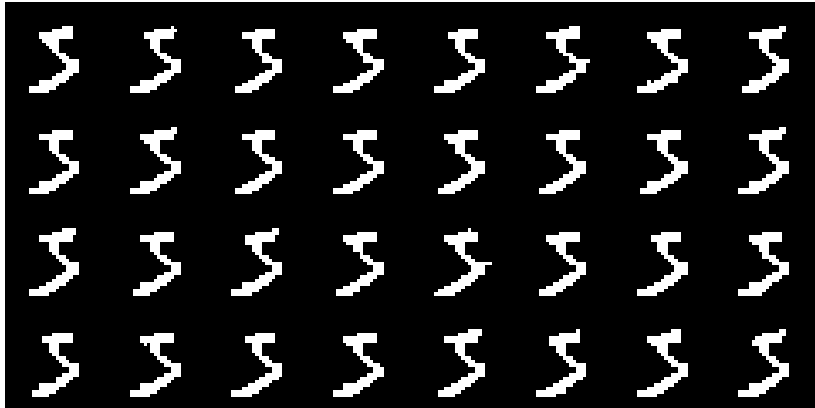

(b) Flow+MH.

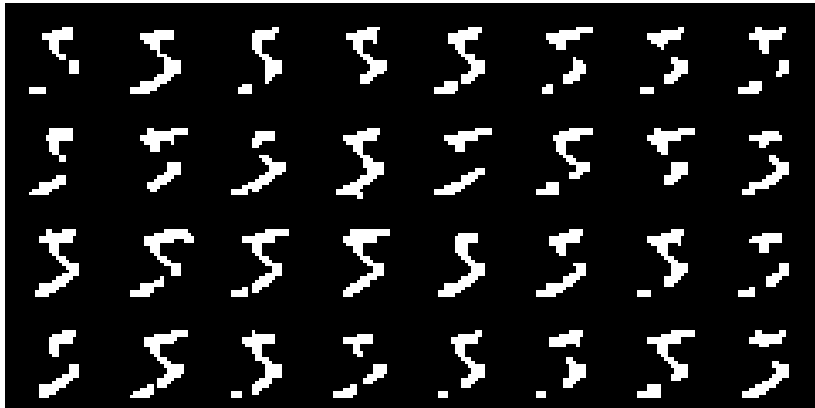

(c) Discrete MCMC.

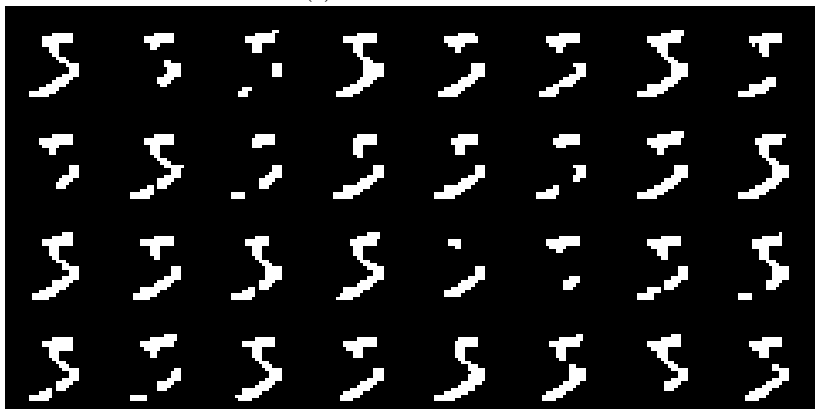

(d) Gibbs.

Figure 3: Original and corrupted MNIST digit together with denoising posterior samples from different MCMC methods. Samples are from independent MCMC chains.
